# Supplementary material
Source: MDPI journal article supplement (https://www.mdpi.com/2073-4433/14/7/1055)
Supplement: s1 [file s1]

# The Response of Southwest Atlantic Storm Tracks to Climate Change in the Brazilian Earth System Model

Juliana Damasceno Dos Santos, Jeferson Prietsch Machado and Jaci Maria Bilhalva Saraiva

Oceanology Post-Graduate Program, Institute of Oceanography, Federal University of Rio Grande, Av. Itália km 8, Carreiros, Rio Grande 96203-900, Brazil

\* Correspondence: jeferson.machado@furg.br

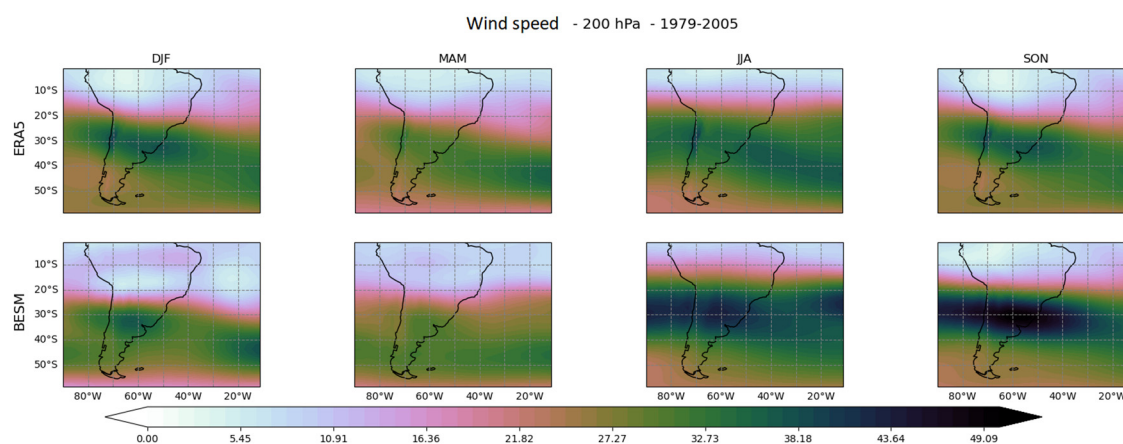

**Figure S1.** Wind speed for the level of 200 hPa ( $\text{ms}^{-1}$ ); seasonal comparison of ERA5 reanalysis with BESM historical data.

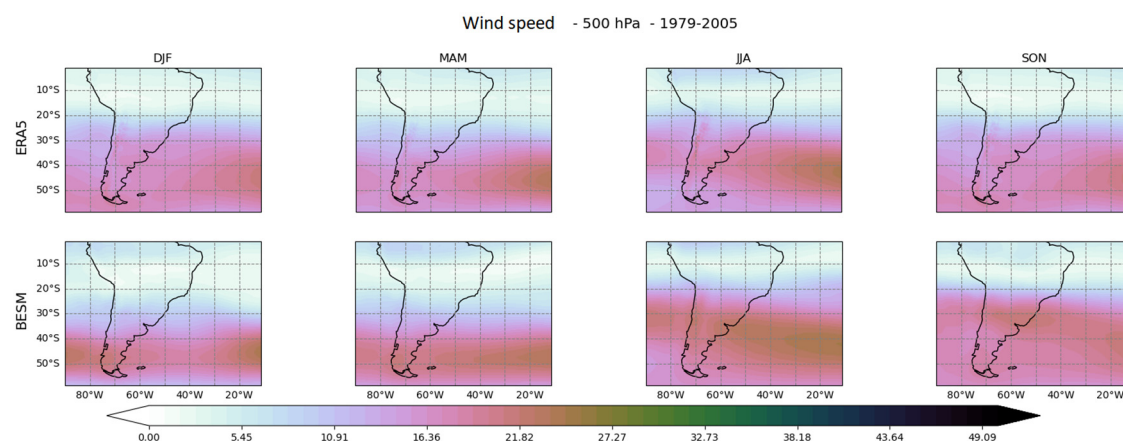

**Figure S2.** Wind speed for the level of 500 hPa ( $\text{ms}^{-1}$ ); seasonal comparison of ERA5 reanalysis with BESM historical data.

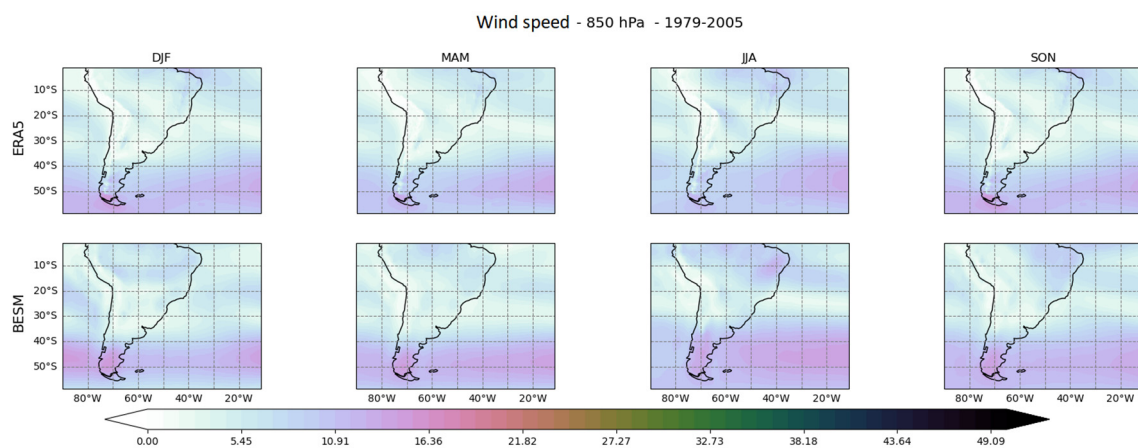

**Figure S3.** Wind speed for the level of 850 hPa (ms<sup>-1</sup>); seasonal comparison of ERA5 reanalysis with BESM historical data.

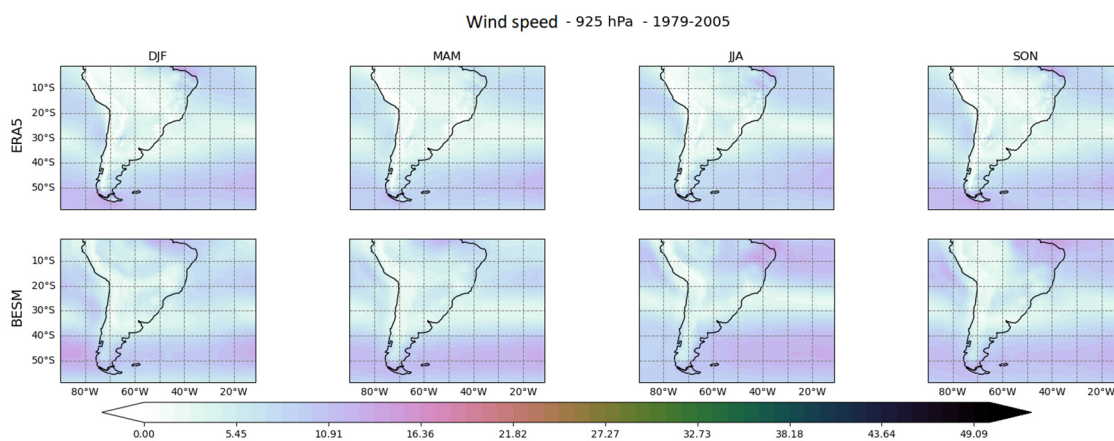

**Figure S4.** Wind speed for the level of 925 hPa (ms<sup>-1</sup>); seasonal comparison of ERA5 reanalysis with BESM historical data.

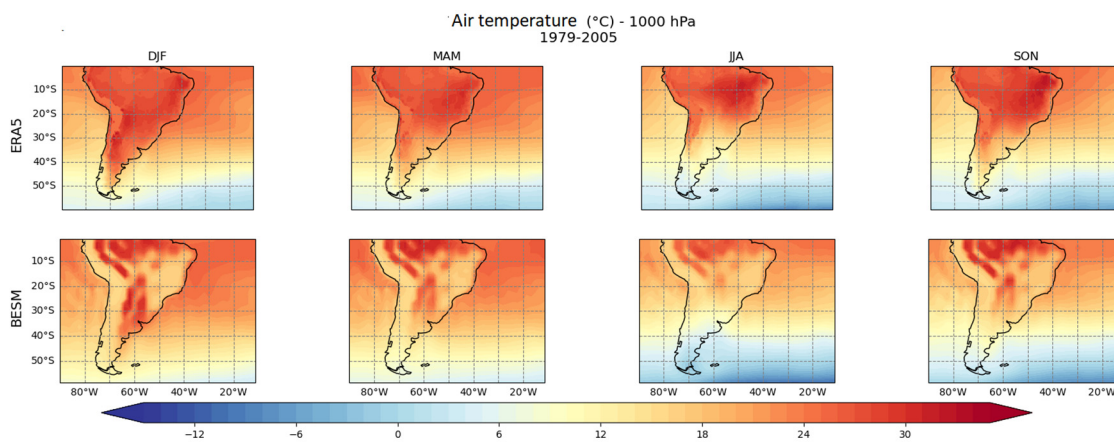

**Figure S5.** Air temperature at 1000 hPa (°C); seasonal comparison of ERA5 reanalysis with BESM historical data.

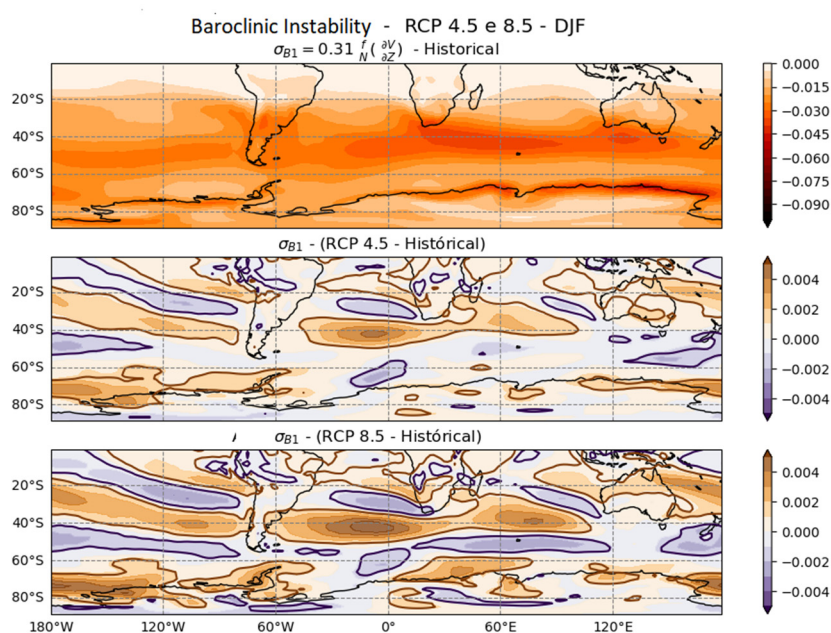

**Figure S6.** Baroclinic instability in DJF ( $\text{day}^{-1}$ ); comparison of RCPs 4.5 and 8.5 with historical data. The lines represent the t-test and the shaded areas represent the anomalies.

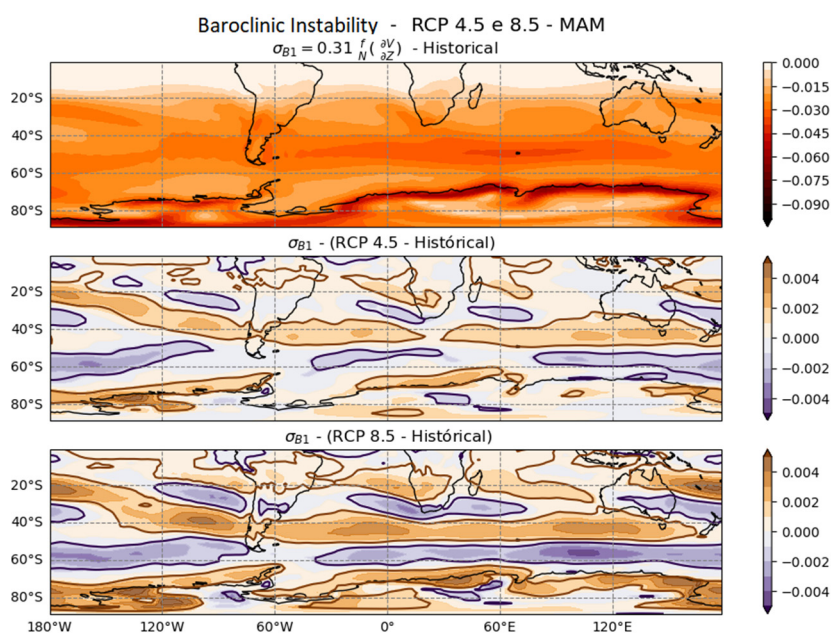

**Figure S7.** Baroclinic instability in MAM ( $\text{day}^{-1}$ ); comparison of RCPs 4.5 and 8.5 with historical data. The lines represent the t-test and the shaded areas represent the anomalies.



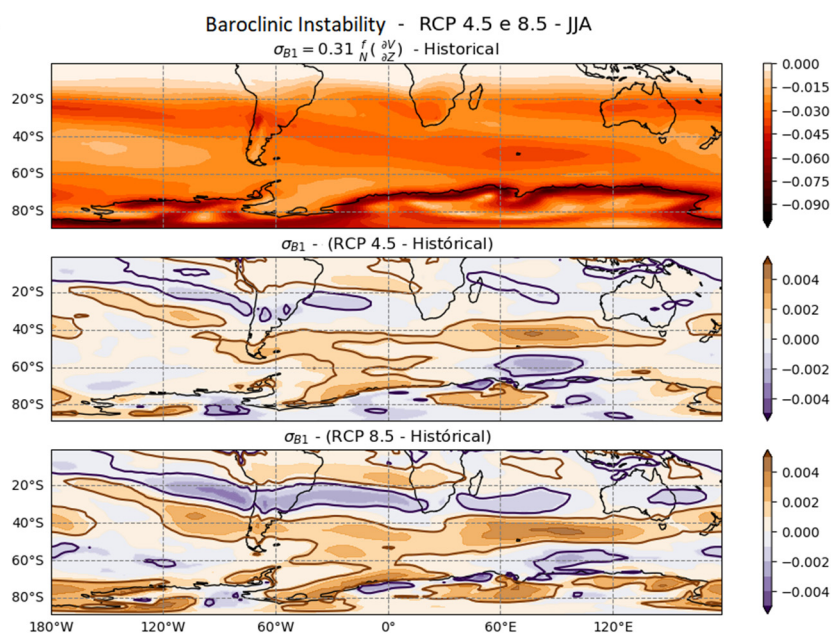

**Figure S8.** Baroclinic instability in JJA ( $\text{day}^{-1}$ ); comparison of RCPs 4.5 and 8.5 with historical data. The lines represent the t-test and the shaded areas represent the anomalies.

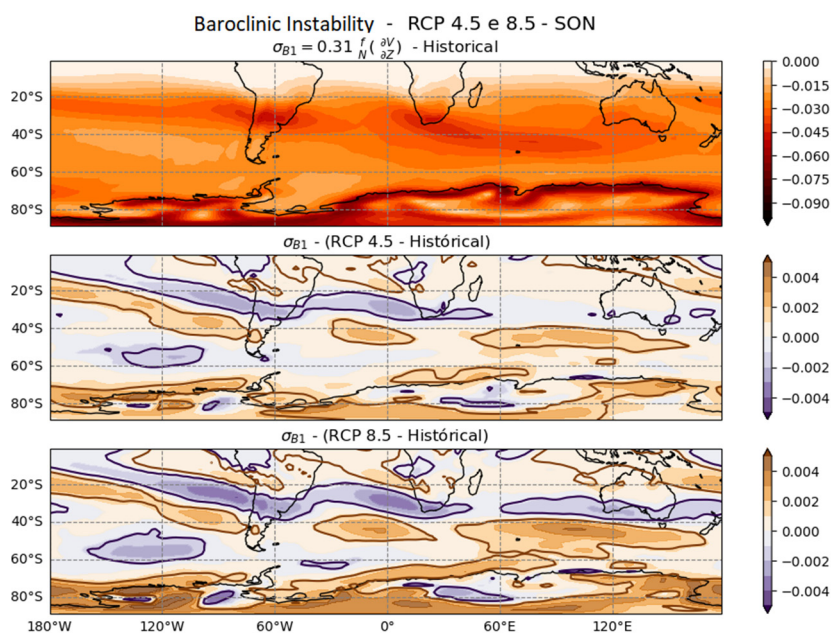

**Figure S9.** Baroclinic instability in SON ( $\text{day}^{-1}$ ); comparison of RCPs 4.5 and 8.5 with historical data. The lines represent the t-test and the shaded areas represent the anomalies.
